# Supplementary material for: Occupancy modeling and resampling overcomes low test sensitivity to produce accurate SARS-CoV-2 prevalence estimates
Source: Springer Nature journal article supplement (doi:10.1186/s12889-021-10609-y), 2021-03-23
Supplement: MOESM1 [file 18995534]

- 1 Additional File 1. Simulation study parameter combinations. Simulation study parameter  
 2 combinations for evaluating the effectiveness of different sampling and biological parameters.

| Parameter                                           | Type     | Low   | Medium | High | Justification                                                                                                                                                                                                                                                                |
|-----------------------------------------------------|----------|-------|--------|------|------------------------------------------------------------------------------------------------------------------------------------------------------------------------------------------------------------------------------------------------------------------------------|
| Number of repeat tests                              | Sampling | 2     |        | 5    | Arbitrary                                                                                                                                                                                                                                                                    |
| Proportion of sampled individuals with repeat tests | Sampling | 0.10  | 0.50   | 1.0  | Arbitrary                                                                                                                                                                                                                                                                    |
| Proportion of sampled individuals                   | Sampling | 0.001 | 0.01   | 0.05 | U.S. average daily testing rate ~0.1% of population/day in May 2020 (1,2), Harvard "Massive Scale Testing" plan calls for testing 2 - 6% of population per day (3)                                                                                                           |
| Test sensitivity (detection probability)            | Sampling | 0.30  |        | 0.78 | Reports in the literature are highly variable (4-16). A literature review by (16) found that sensitivity for nasal swabs averaged 73.3% (95% CI 68.1–78.0%) when using RT-qPCR. There are, however, reasons to believe that these values may be biased high when compared to |

---

samples taken from random and therefore primarily non-symptomatic patients. Some proportion of the sample will have just contracted the disease and will likely have low viral loads in their nasal passages. Similarly, some proportion of the population will be asymptomatic: we know little about this group but can assume that viral loads in their nasal passages will likely be lower than those that are either presymptomatic or symptomatic. If this is the case, tests on asymptomatic patients would be expected to have lower sensitivity than indicated by published results. We assume that there would be a group of recently infected people in our sample, entirely asymptomatic, who would be sick, but would seldom test positive (17).

---

---

|                                                  |            |       |      |      |                                                                                                                                                                                                                     |
|--------------------------------------------------|------------|-------|------|------|---------------------------------------------------------------------------------------------------------------------------------------------------------------------------------------------------------------------|
| Probability of<br>being infected<br>( $\psi_i$ ) | Biological | 0.001 | 0.01 | 0.10 | Total confirmed positive overall in<br>the US is ~2.3% (7,894,768 U.S.<br>cases confirmed positive (18),<br>330,455,538 U.S. population (19)).<br>Range of values were selected to be<br>relevant for surveillance. |
|--------------------------------------------------|------------|-------|------|------|---------------------------------------------------------------------------------------------------------------------------------------------------------------------------------------------------------------------|

---

3

4

## 5 **References**

- 6 1. Coronavirus (COVID-19) Testing [Internet]. [cited 2020 May 15]. Available from:  
7 [https://ourworldindata.org/coronavirus-testing#the-scale-of-testing-compared-to-the-scale-](https://ourworldindata.org/coronavirus-testing#the-scale-of-testing-compared-to-the-scale-of-the-outbreak)  
8 [of-the-outbreak](https://ourworldindata.org/coronavirus-testing#the-scale-of-testing-compared-to-the-scale-of-the-outbreak)
- 9 2. The COVID Tracking Project [Internet]. [cited 2020 May 15]. Available from:  
10 <https://covidtracking.com/data>
- 11 3. Bryant, JamesAllen D, Block S, Cohen J, Eckersley P, Eifler M, Gostin L, et al. Roadmap  
12 to pandemic resilience [Internet]. Edmond J. Safra Center for Ethics, Harvard University;  
13 2020. p. 56. Available from: <https://ethics.harvard.edu/covid-roadmap>
- 14 4. Scohy A, Anantharajah A, Bodéus M, Kabamba-Mukadi B, Verroken A, Rodriguez-  
15 Villalobos H. Low performance of rapid antigen detection test as frontline testing for  
16 COVID-19 diagnosis. *J Clin Virol* [Internet]. 2020;129(May):104455. Available from:  
17 <https://doi.org/10.1016/j.jcv.2020.104455>
- 18 5. Mak GC, Cheng PK, Lau SS, Wong KK, Lau CS, Lam ET, et al. Evaluation of rapid  
19 antigen test for detection of SARS-CoV-2 virus. *J Clin Virol* [Internet].  
20 2020;129(June):104500. Available from: <https://doi.org/10.1016/j.jcv.2020.104500>
- 21 6. Linares M, Pérez-Tanoira R, Carrero A, Romanyk J, Pérez-García F, Gómez-Herruz P, et  
22 al. Panbio antigen rapid test is reliable to diagnose SARS-CoV-2 infection in the first 7  
23 days after the onset of symptoms. *J Clin Virol*. 2020;133(September):3–6.
- 24 7. Xie X, Zhong Z, Zhao W, Zheng C, Wang F, Liu J. Chest CT for typical coronavirus  
25 disease 2019 (COVID-19) pneumonia: relationship to negative RT-PCR testing.

- 26 Radiology. 2020;296(2):E41–5.
- 27 8. Arevalo-Rodriguez I, Buitrago-Garcia D, Simancas-Racines D, Zambrano-Achig P, del  
28 Campo R, Ciapponi A, et al. False-Negative Results of Initial Rt-Pcr Assays for Covid-19:  
29 a Systematic Review. 2020;1–33.
- 30 9. Williams TC, Wastnedge E, McAllister G, Bhatia R, Cuschieri K, Kefala K, et al.  
31 Sensitivity of RT-PCR testing of upper respiratory tract samples for SARS-CoV-2 in  
32 hospitalised patients: a retrospective cohort study. medRxiv.
- 33 10. Luo L, Liu D, Wang Z, Chen P, Mao C. Modes of contact and risk of transmission in  
34 COVID-19 : a prospective cohort study 4 950 close contact persons in Guangzhou of  
35 China. Lancet.
- 36 11. Fang Y, Nie Y, Penny M. Transmission dynamics of the COVID-19 outbreak and  
37 effectiveness of government interventions: A data-driven analysis. J Med Virol.  
38 2020;92(6):645–59.
- 39 12. Meyerson NR, Yang Q, Clark SK, Paige CL, Fattor WT, Gilchrist AR, et al. A  
40 community-deployable SARS-CoV-2 screening test using raw saliva with 45 minutes  
41 sample-to-results turnaround. medRxiv [Internet]. 2020;2020.07.16.20150250. Available  
42 from: <https://doi.org/10.1101/2020.07.16.20150250>
- 43 13. Chan JF-W, Yip CC-Y, To KK-W, Tang TH-C, Wong SC, Leung K-H, et al. Improved  
44 molecular diagnosis of COVID-19 by the novel, highly sensitive and specific COVID-  
45 19-RdRp/Hel real-time reverse transcription-PCR assay validated in vitro and with clinical  
46 specimens. J Clin Microbiol. 2020;(April):1–10.

- 47 14. Long C, Xu H, Shen Q, Zhang X, Fan B, Wang C, et al. Diagnosis of the Coronavirus  
48 disease (COVID-19): rRT-PCR or CT? *Eur J Radiol* [Internet]. 2020;126(March):108961.  
49 Available from: <https://doi.org/10.1016/j.ejrad.2020.108961>
- 50 15. Woloshin S, Patel N, Kesselheim AS. False negative tests for SARS-CoV-2 infection -  
51 challenges and implications. *N Engl J Med* [Internet]. 2020;38(1):1–2. Available from:  
52 [nejm.org](http://nejm.org)
- 53 16. Böger B, Fachi MM, Vilhena RO, Cobre AF, Tonin FS, Pontarolo R. Systematic review  
54 with meta-analysis of the accuracy of diagnostic tests for COVID-19. *Am J Infect Control*.  
55 2020;000.
- 56 17. Larremore DB, Wilder B, Lester E, Shehata S, Burke JM, Hay JA, et al. Test sensitivity is  
57 secondary to frequency and turnaround time for COVID-19 surveillance. *medRxiv*  
58 [Internet]. 2020;2020.06.22.20136309. Available from:  
59 <https://www.medrxiv.org/content/10.1101/2020.06.22.20136309v2>  
60 [https://www.medrxiv.org/c](https://www.medrxiv.org/content/10.1101/2020.06.22.20136309v2.abstract)  
61 [ontent/10.1101/2020.06.22.20136309v2](https://www.medrxiv.org/content/10.1101/2020.06.22.20136309v2)  
62 [https://www.medrxiv.org/content/10.1101/20](https://www.medrxiv.org/content/10.1101/2020.06.22.20136309v2)  
[20.06.22.201](https://www.medrxiv.org/content/10.1101/2020.06.22.20136309v2)
- 63 18. CDC COVID Data Tracker [Internet]. [cited 2020 Oct 16]. Available from:  
64 [https://covid.cdc.gov/covid-data-tracker/#trends\\_dailytrendscases](https://covid.cdc.gov/covid-data-tracker/#trends_dailytrendscases)
- 65 19. U.S. and World Population Clock [Internet]. [cited 2020 Oct 16]. Available from:  
66 <https://www.census.gov/popclock/>
