# Supplementary material for: Occupancy modeling and resampling overcomes low test sensitivity to produce accurate SARS-CoV-2 prevalence estimates
Source: Springer Nature journal article supplement (doi:10.1186/s12889-021-10609-y), 2021-03-23
Supplement: MOESM2 [file 18995534]

1 **Additional file 2.** Simulation summary. Simulation summary for relative root mean square error,  
 2 relative bias, percent coverage, Bayesian Credible Interval length, and optimization

3

4 As with any monitoring program designed to evaluate trends, standardized sampling  
 5 designs that can achieve sufficient power to meet objectives will contribute to more robust  
 6 monitoring data sets (1). Our simulation study was designed to evaluate the level of inference for  
 7 disease prevalence at different biological and sampling scenarios, which is important information  
 8 to determine if sufficient power is available to meet objectives for disease mitigation strategies.  
 9 We evaluated bias, percent coverage, and precision with our simulation scenarios (described  
 10 below) for the parameters of prevalence and test sensitivity, in addition to accuracy (described in  
 11 the main text). We also describe additional components of our optimization results to help guide  
 12 decisions on how to allocate sampling effort with limited resources.

13

#### 14 **Bias**

15 We calculated relative bias, RBIAS, or the difference between our parameter estimate  
 16 and the true parameter value as follows:

$$17 \quad RBIAS = \frac{\left( (1/r) \sum_{l=1}^r (\hat{\theta}_l - \theta_l) \right)}{\bar{\theta}},$$

18 where  $r$  was the number of replicates,  $\hat{\theta}_l$  was the estimated parameter posterior median at  
 19 replicate  $l$ ,  $\theta_l$  was the true parameter at replicate  $l$ , and  $\bar{\theta}$  was the mean of the true parameter  
 20 values over all replicates.

21 Bias with test sensitivity was most influenced by percent infected and true test sensitivity  
22 (Supplementary Figure 1). Lower test sensitivity tended to have higher negative bias with the test  
23 sensitivity parameter. Over all simulation scenarios, test sensitivity was primarily negatively  
24 biased, with less bias as the percent infected increased (Supplementary Figure 2).

25 Bias with prevalence was positive, and mostly influenced by the percent initially sampled  
26 and percent infected over all simulation scenarios (Supplementary Figure 3). For low prevalence  
27 (0.1%), increased sampling was more important in reducing bias than at higher prevalence levels.  
28 Using an occupancy modeling approach resulted in similar levels of bias with different test  
29 sensitivity across all simulation scenarios (Supplementary Figure 3).

30

### 31 **Accuracy**

32 We used relative root mean square error (RRMSE) to evaluate accuracy (the combination  
33 of bias and precision) with our simulation scenarios (defined in the main text). For test  
34 sensitivity, accuracy was highest with 10% of the population infected (Supplementary Figure 4).  
35 Accuracy of prevalence improved with increased proportions of the population initially sampled  
36 across all simulation scenarios (Supplementary Figure 5). Increased accuracy was most  
37 prominent at low prevalence (0.1%) with increases in sampling effort from the proportion of the  
38 population initially sampled, number of repeat tests, and percent of the initial population with  
39 repeat tests (Supplementary Figure 5). These improvements in accuracy with increased sampling  
40 effort were also apparent at 1% and 10% prevalence, but had smaller relative improvements in  
41 accuracy (Supplementary Figure 6).

42

### 43 **Percent coverage**

44           Percent coverage was calculated as the number of times the true parameter value was  
45 contained within the 95% Bayesian Credible Interval (BCI) for each replicate out of the total  
46 number of replicates. Percent coverage for test sensitivity at 10% of the population infected was  
47 high (near the nominal 95% frequentist level), but variable at lower prevalence levels  
48 (Supplementary Figure 7). Percent coverage for prevalence was low with our simulation  
49 scenarios, likely due to increases in precision for prevalence with more sampling effort but more  
50 relative bias compared to test sensitivity (Supplementary Figures 2, 3, 8, 9).

51

### 52 **Precision**

53           We used the 95% BCI length (upper 95% BCI minus the lower 95% BCI) to evaluate  
54 precision with our simulation scenarios. Test sensitivity and prevalence precision increased with  
55 more sampling effort, and showed similar precision between the two different test sensitivity  
56 levels as well as across the different prevalence levels (Supplementary Figures 8 and 9).

57

### 58 **Optimization**

59           We illustrate a constrained optimization framework over all simulation scenarios for  
60 prevalence accuracy using a constraint of \$20,000. Levels of accuracy were similar for both test  
61 sensitivity values from our simulation scenarios, but costs varied greatly; thus for reduced cost,  
62 similar accuracy could be achieved with the rapid tests (Supplementary Figure 10). We also  
63 illustrate that the optimal sampling strategy is the same for 10% prevalence, compared to 1%  
64 prevalence (main text Figure 4b, Supplementary Figure 11).

65 **References**

- 66 1. Sanderlin JS, Morrison ML, Block WM. Analysis of population monitoring data. In:  
67 Brennan LA, Tri AN, Marcot BG, editors. Quantitative Analyses in Wildlife Science.  
68 Baltimore, MD: The Johns Hopkins University Press; 2019. p. 131–48.

69

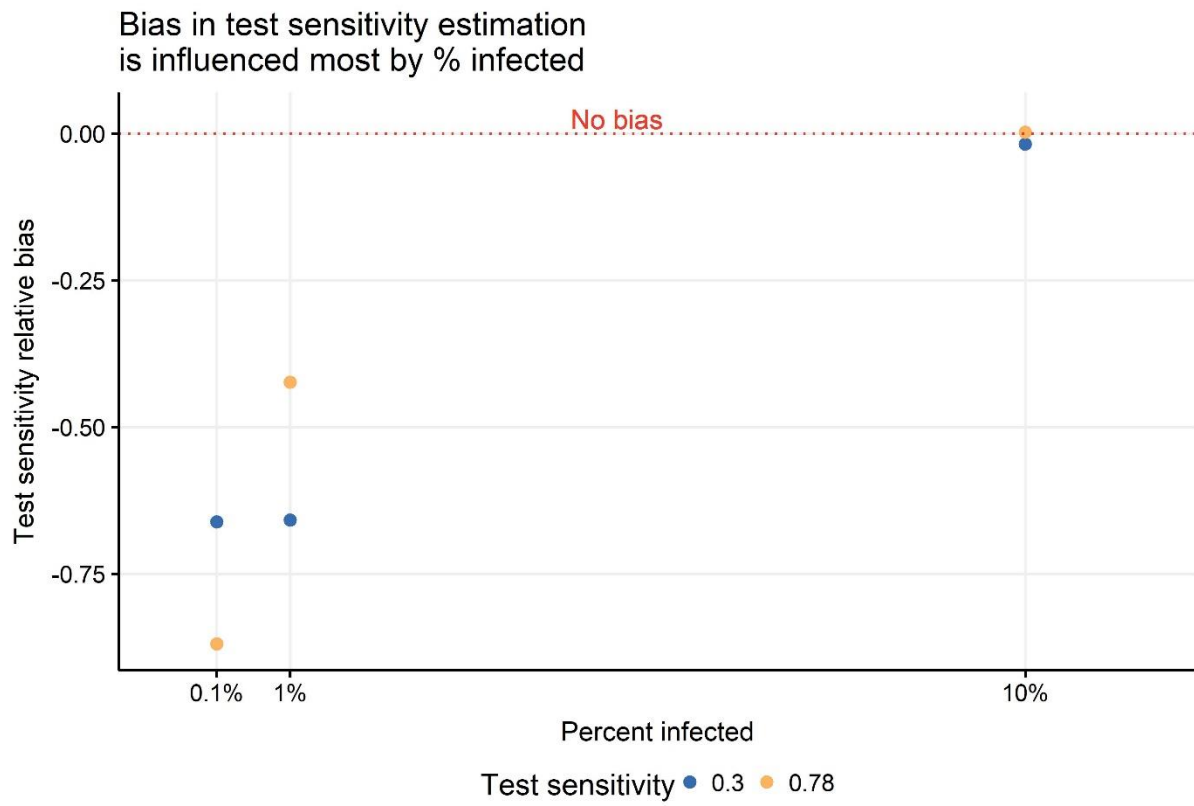

70

71 Supplementary Figure 1. Relative bias of test sensitivity as a function of percent of the  
72 population infected for simulation scenarios of 5% of the population initially sampled and 100%  
73 of that sample with 5 repeat tests.

74



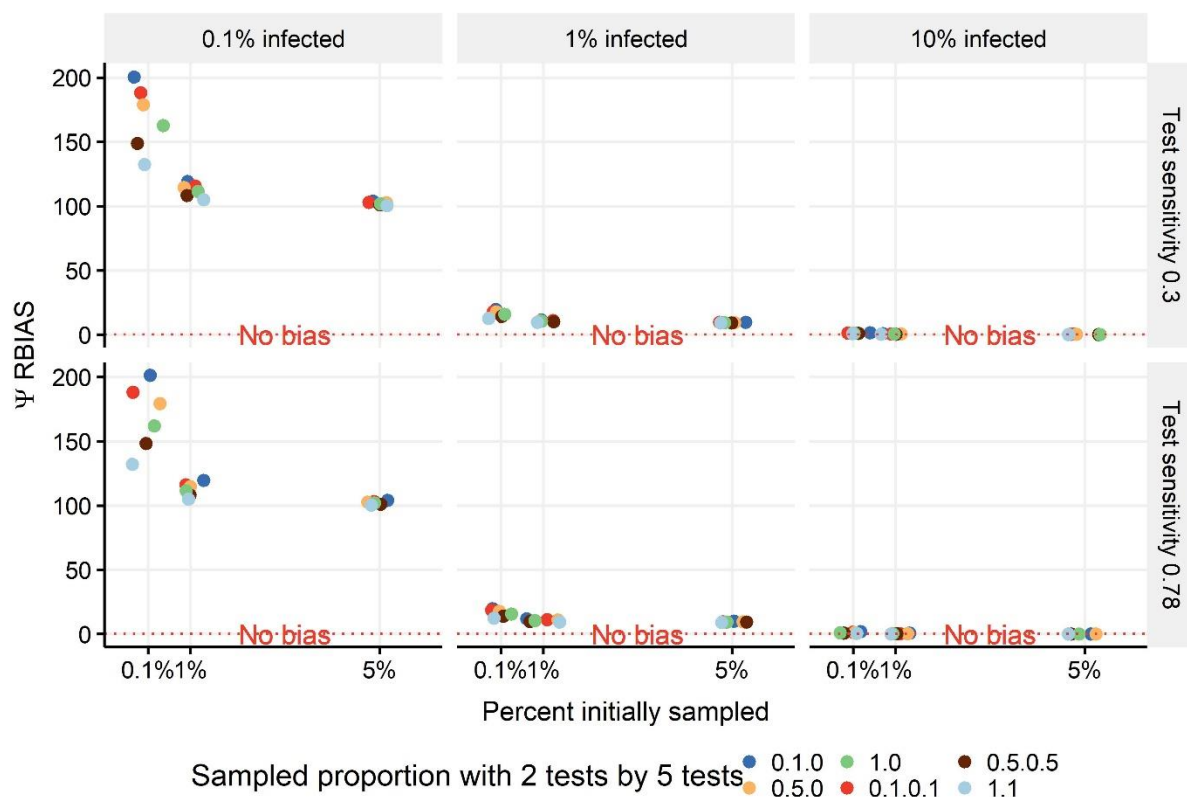

80

81 Supplementary Figure 3. Relative bias of prevalence as a function of percent of the population  
82 infected, test sensitivity, and percent initially sampled for different sampled proportions with 2  
83 and 5 repeat tests.

84





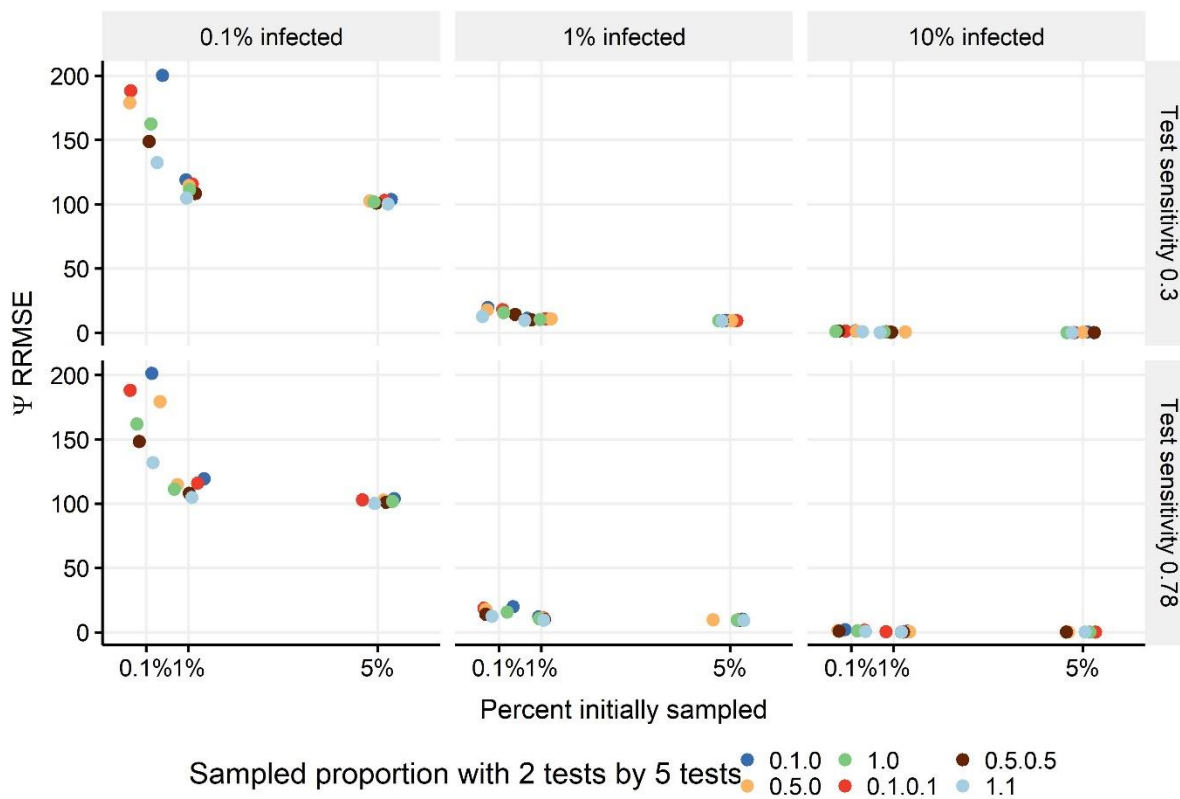

90

91 Supplementary Figure 5. Accuracy (Relative root mean square error; RRMSE) of prevalence as a  
 92 function of percent of the population infected, test sensitivity, and percent initially sampled for  
 93 different sampled proportions with 2 and 5 repeat tests.

94

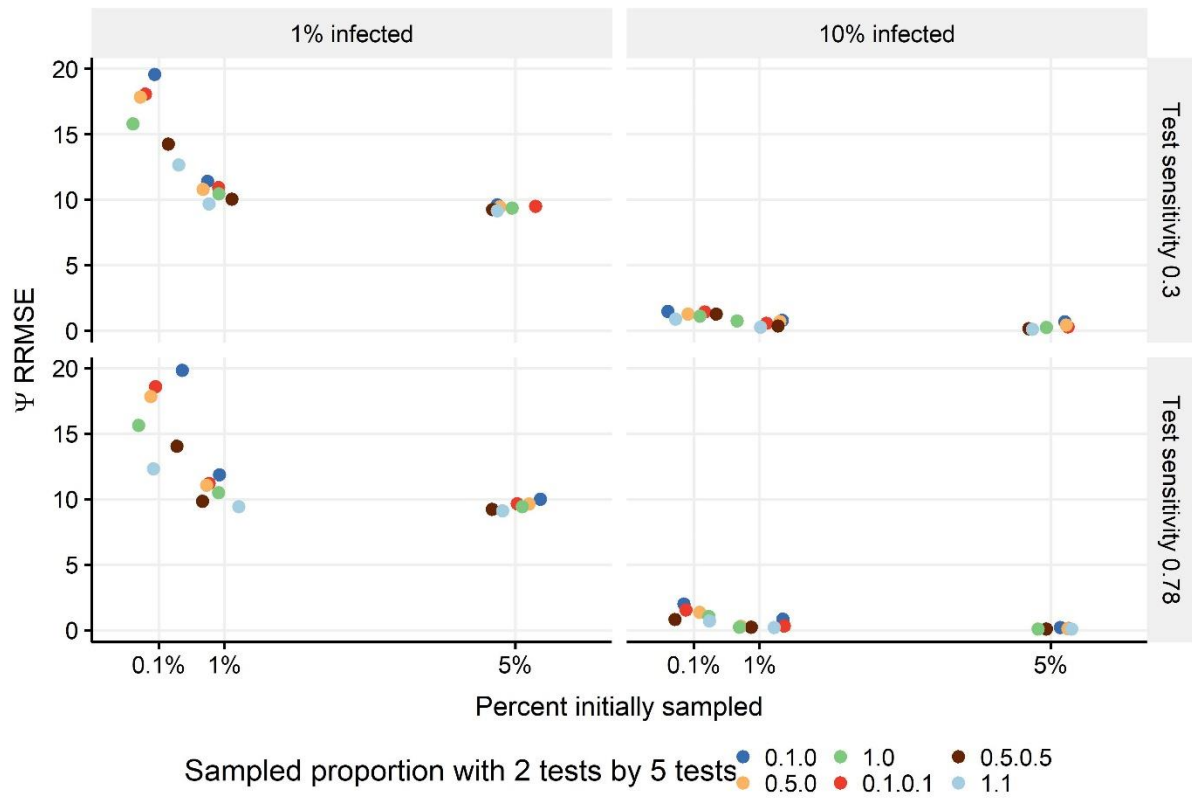

95

96 Supplementary Figure 6. Accuracy (Relative root mean square error; RRMSE) of prevalence as a  
 97 function of 1% and 10% of the population infected, test sensitivity, and percent initially sampled  
 98 for different sampled proportions with 2 and 5 repeat tests.

99

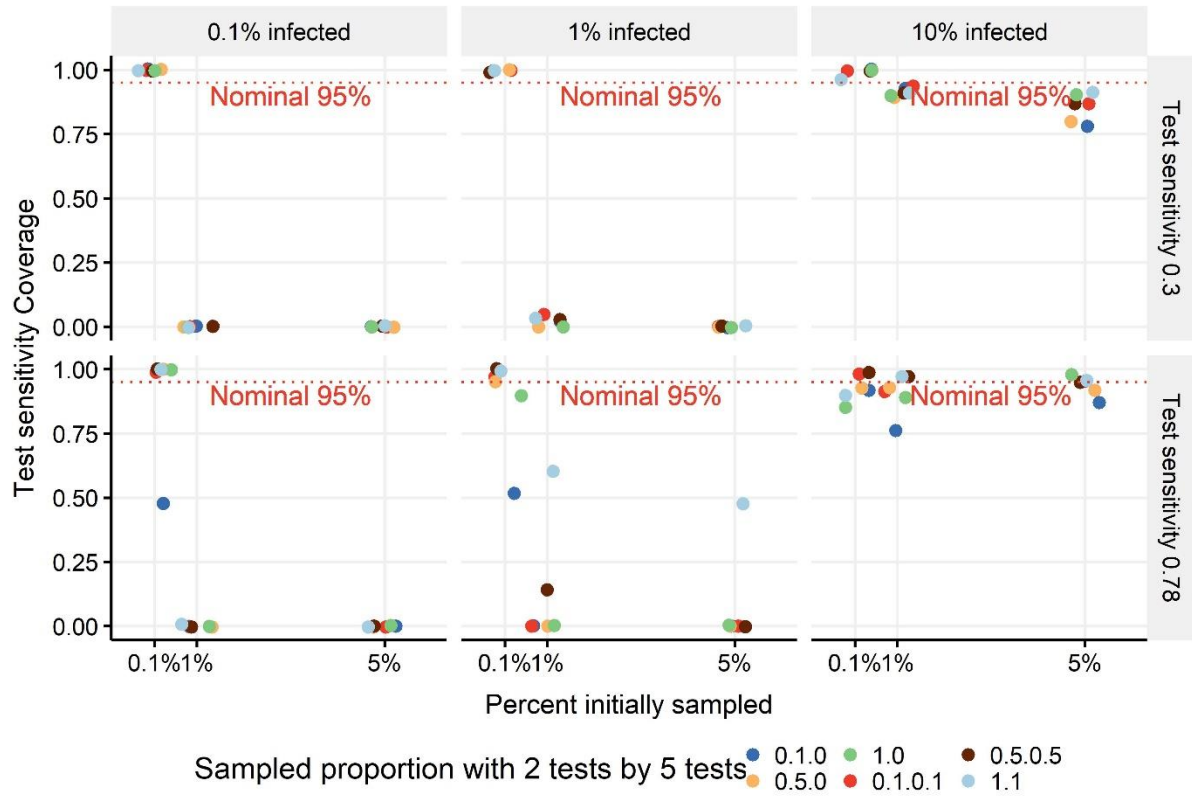

100

101 Supplementary Figure 7. Percent coverage of test sensitivity as a function of percent of the  
 102 population infected, test sensitivity, and percent initially sampled for different sampled  
 103 proportions with 2 and 5 repeat tests. Nominal 95% frequentist level for coverage is indicated on  
 104 the plot.

105

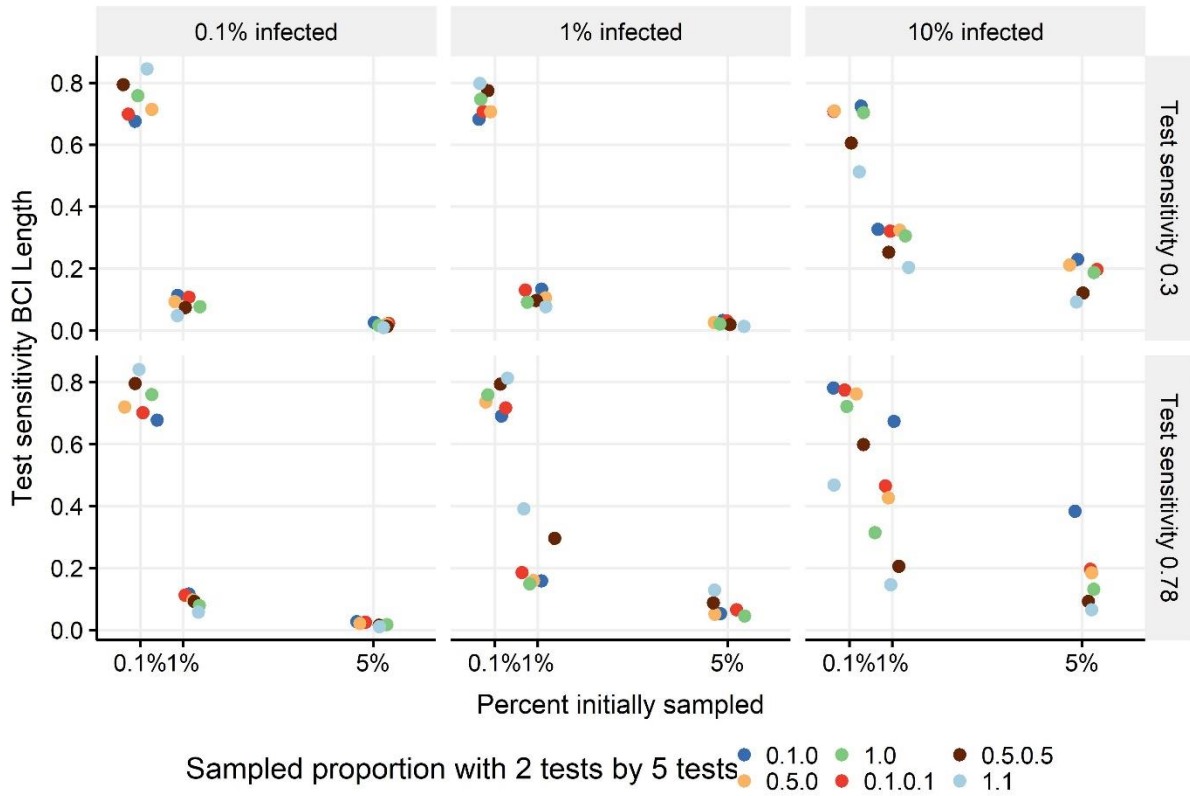

106

107 Supplementary Figure 8. Precision (Bayesian Credible Interval length; BCI length) of test  
 108 sensitivity as a function of percent of the population infected, test sensitivity, and percent  
 109 initially sampled for different sampled proportions with 2 and 5 repeat tests.

110

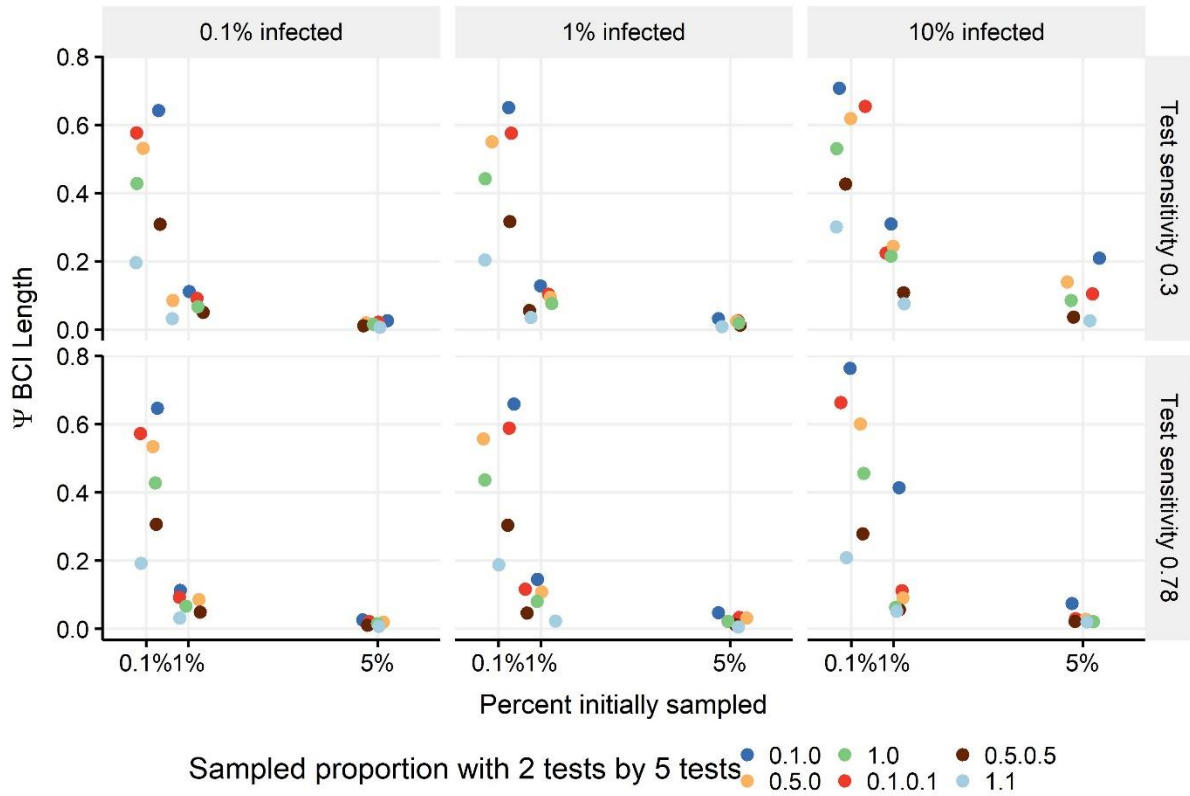

111

112 Supplementary Figure 9. Precision (Bayesian Credible Interval length; BCI length) of prevalence  
 113 as a function of percent of the population infected, test sensitivity, and percent initially sampled  
 114 for different sampled proportions with 2 and 5 repeat tests.

115

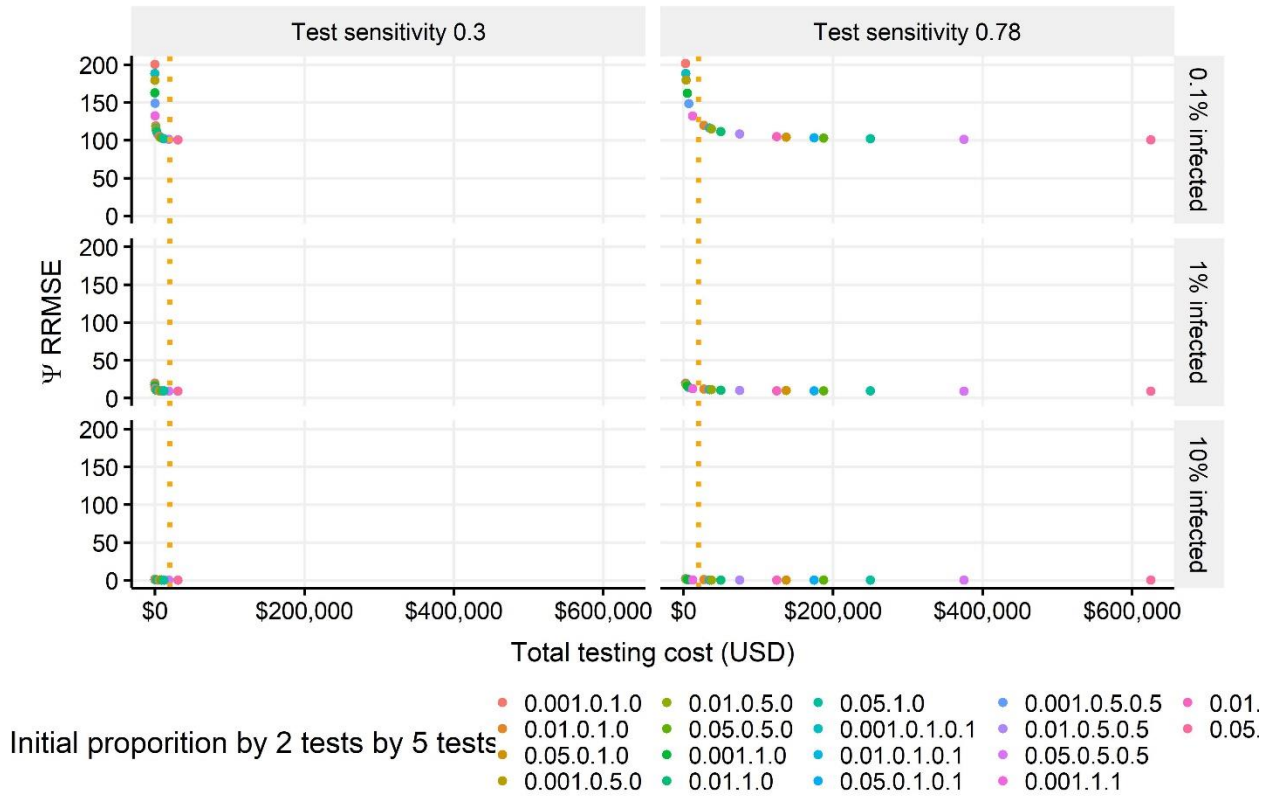

116

117 Supplementary Figure 10. Accuracy (relative root mean square error) of prevalence ( $\Psi$ ) as a  
 118 function of costs (USD) using arbitrary cost constraint (dotted vertical line) of \$20,000 USD for  
 119 all simulation scenarios as a function of percent of the population infected and test sensitivity for  
 120 different sampled proportions of the population initially sampled, with 2 repeat tests, and with 5  
 121 repeat tests.

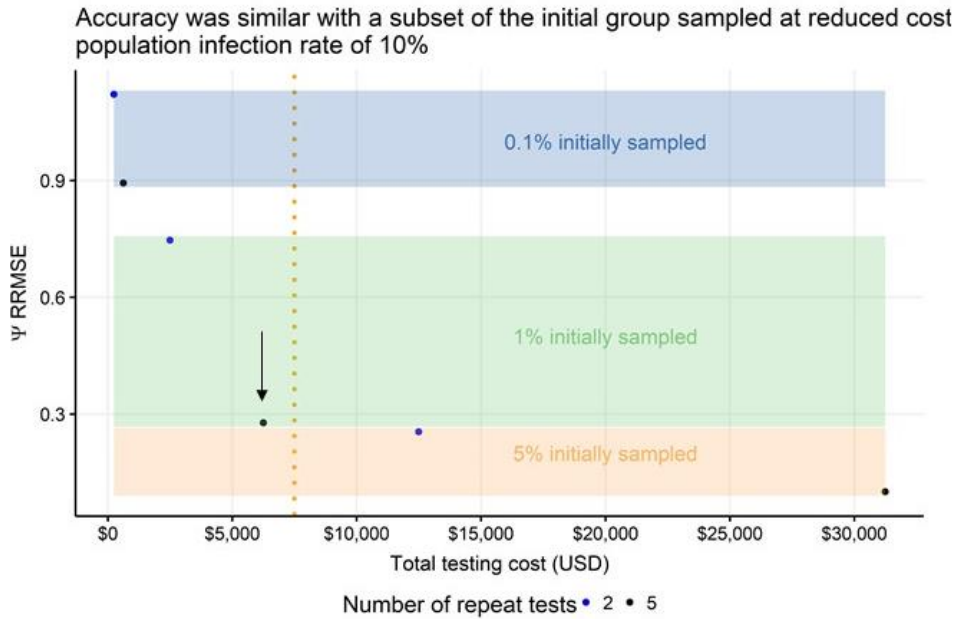

122

123 Supplementary Figure 11. Accuracy (relative root mean square error) of prevalence ( $\Psi$ ) as a  
 124 function of costs (USD) using arbitrary cost constraint (dotted vertical line) of \$7,500 USD for a  
 125 subset of the simulation scenarios with the true test sensitivity of 0.3, true population infection  
 126 rate (true prevalence) of 10%, and 100% of the initially sampled population with repeat tests.  
 127 Optimal design is indicated within the figure with an arrow.
