# Supplementary material for: Occupancy modeling and resampling overcomes low test sensitivity to produce accurate SARS-CoV-2 prevalence estimates
Source: Springer Nature journal article supplement (doi:10.1186/s12889-021-10609-y), 2021-03-23
Supplement: MOESM5 [file 18995534]

1 **Additional file 5.** Individual-level inference from occupancy model results

2

3 In occupancy modeling, wildlife and fisheries literature recommends sampling more sites  
4 (individuals) fewer times (repeat tests) as preferable when species are particularly rare (1–3).  
5 General sampling recommendations also include increasing the number of sites instead of  
6 sampling occasions per site when detection probabilities are high and increasing sampling  
7 occasions per site as detection probabilities decrease (4). These sampling recommendations are  
8 recommended for prevalence inference but can also assist with individual-level inference due to  
9 better estimates of test sensitivity using repeated samples necessary for occupancy modeling.

10 Individual-level inference requires accurate estimates of test sensitivity and may have  
11 different optimal sampling strategies if the objective is at the individual-level due to false  
12 negatives with testing (Supplementary Figure 1). We illustrate this concept with the number of  
13 repeat tests needed for determining the probability of detecting the disease at the individual level  
14 using our true test sensitivity values of 0.3 and 0.78. The probability of a false negative is  
15 calculated as:  $(1 - \text{test sensitivity})^k$  where  $k$  is the number of tests. From the occupancy  
16 literature(5) a range of 0.05 to 0.15 is recommended for best inference for the probability of a  
17 false negative. The probability of detecting the disease at least once during  $k$  tests with an  
18 individual that has the disease ( $p^*$  in the occupancy literature) is calculated as:  $1 - (1 - \text{test}$   
19  $\text{sensitivity})^k$ . Using our true values for test sensitivity, we illustrate how calculating the  
20 probability of detecting the disease at least once during  $k$  tests with an individual that has the  
21 disease shows that repeat sampling is more important with lower test sensitivities  
22 (Supplementary Figure 2).

23 **References**

- 24 1. Sanderlin JS, Block WM, Ganey JL. Optimizing study design for multi-species avian  
25 monitoring programmes. *J Appl Ecol.* 2014;51(4):860–70.
- 26 2. Mackenzie DI, Royle JA. Designing Occupancy Studies : General Advice and Allocating  
27 Survey Effort. *J Appl Ecol.* 2005;42(6):1105–14.
- 28 3. Field S, Tyre A, Possingham H. Optimizing Allocation of Monitoring Effort Under  
29 Economic and Observational Constraints. *J Wildl Manage.* 2005;69(3):473–82.
- 30 4. Tyre AJ, Tenhumberg B, Field SA, Niejalke D, Parris K, Possingham HP. Improving  
31 precision and reducing bias in biological surveys: Estimating false-negative error rates.  
32 *Ecol Appl.* 2003;13(6):1790–801.
- 33 5. Mackenzie DI, Nichols JD, Royle JA, Pollock KH, Bailey LL, Hines JE. Occupancy  
34 estimation and modeling. New York, New York: Academic Press; 2006.

35

36

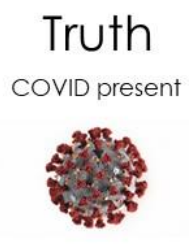

### What we observe with testing

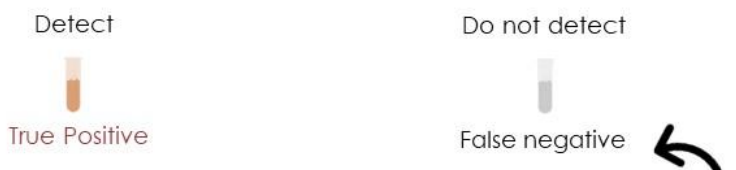

Chance of false negative depends on test sensitivity

Lower test sensitivity =  more likely  
False negative

37

38 Supplementary Figure 1. Probability of a false negative and test sensitivity. SARS-CoV-2 image  
39 credit: Centers for Disease Control and Prevention, Alissa Eckert (MSMI) and Dan Higgins  
40 (MAMS).

41

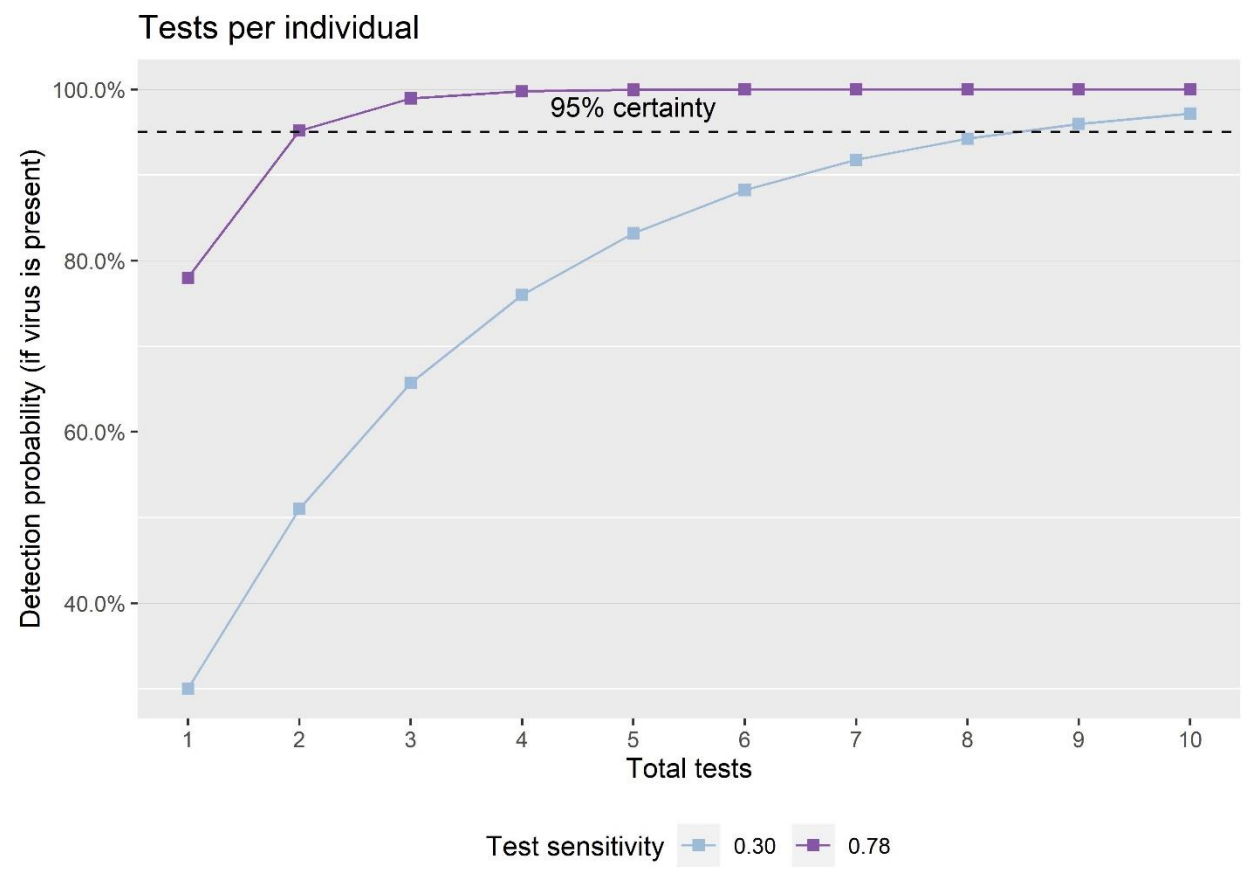

42

43 Supplementary Figure 2. Probability of detecting the disease at least once with an individual that  
44 has the disease as a function of total tests. Occupancy literature recommends a false negative  
45 error rate range between 0.05-0.15 (or a 95% probability of detecting the disease at least once).
