# Supplementary material for: Occupancy modeling and resampling overcomes low test sensitivity to produce accurate SARS-CoV-2 prevalence estimates
Source: BMC Public Health. 2021 Mar 23;21:577. doi: 10.1186/s12889-021-10609-y (PMC7986646; doi:10.1186/s12889-021-10609-y)
Supplement: Supplementary file 4 — Additional file 4. Simulation data. Simulation data summarized by simulation parameter combination. These data were used for all plots presented within the paper. [file 12889_2021_10609_MOESM4_ESM.csv]

n.counties	mu.pop	psi.infected	p.test	p.init.samp	p.rep1.samp	p.rep234.samp	per.pos	per.pos.rbias	per.pos.rrmse	psi.rbias	p.rbias	psi.cover	p.cover	psi.bcilen	p.bcilen	psi.rrmse	p.rrmse	convergence	reps.missing
1	25000	0.001	0.3	0.001	0.1	0	0	-1	1	200.3411093	-0.311027181	0	1	0.642138381	0.676228854	200.3652518	0.311126477	1	0
1	25000	0.001	0.3	0.001	0.1	0.1	0.00030303	-0.696969697	3.094620469	188.1791506	-0.289243655	0	1	0.576787476	0.699063707	188.2135785	0.29045934	1	0
1	25000	0.001	0.3	0.001	0.5	0	0	-1	1	178.9686593	-0.322703202	0	1	0.531541613	0.713793611	178.9784678	0.322795618	1	0
1	25000	0.001	0.3	0.001	0.5	0.5	0.000273973	-0.726027397	2.82101994	148.7743213	-0.222199208	0	1	0.308686253	0.793661311	148.8029688	0.222729687	1	0
1	25000	0.001	0.3	0.001	1	0	2.00E-04	-0.8	2.144761059	162.5720018	-0.340059901	0	1	0.427936932	0.758855716	162.6342187	0.340176816	1	0
1	25000	0.001	0.3	0.001	1	1	0.00048	-0.52	3	132.4366018	-0.12609075	0	1	0.196406191	0.844629902	132.4726384	0.155857707	1	0
1	25000	0.001	0.3	0.01	0	0	0.00032	-0.68	1.4	120.4193449	-0.595030514	0	0	0.119482019	0.119468772	120.4290142	0.595051141	1	0
1	25000	0.001	0.3	0.01	0.1	0	0.000327273	-0.672727273	1.341640786	119.0497787	-0.598789368	0	0	0.111460664	0.113178277	119.0596092	0.598805416	1	0
1	25000	0.001	0.3	0.01	0.1	0.1	0.000114286	-0.885714286	1.047835475	115.6923374	-0.604112934	0	0	0.091065169	0.107684353	115.6940579	0.604118723	1	0
1	25000	0.001	0.3	0.01	0.5	0	0.000293333	-0.706666667	1.093414631	114.5854251	-0.611265544	0	0	0.085281124	0.092881118	114.5888859	0.611272039	1	0
1	25000	0.001	0.3	0.01	0.5	0.5	0.000373333	-0.626666667	1.148912529	108.3168942	-0.625281463	0	0	0.049778449	0.073847179	108.3178792	0.625310185	1	0
1	25000	0.001	0.3	0.01	1	0	0.00048	-0.52	1.280624847	111.4731322	-0.621013113	0	0	0.067065135	0.076448968	111.4776354	0.621029721	1	0
1	25000	0.001	0.3	0.01	1	1	0.000248	-0.752	0.97897906	104.9957507	-0.639367872	0	0	0.031823337	0.047470171	104.9959992	0.639371741	1	0
1	25000	0.001	0.3	0.05	0.1	0	0.000290909	-0.709090909	0.857634648	103.8255611	-0.650392021	0	0	0.025472405	0.025903322	103.8257743	0.650392488	1	0
1	25000	0.001	0.3	0.05	0.1	0.1	0.000274286	-0.725714286	0.878310066	103.00988	-0.652221518	0	0	0.021184396	0.023181907	103.0100056	0.652221999	1	0
1	25000	0.001	0.3	0.05	0.5	0	0.000298667	-0.701333333	0.822030008	102.6740665	-0.653911088	0	0	0.019416055	0.02031972	102.6741704	0.653911332	1	0
1	25000	0.001	0.3	0.05	0.5	0.5	0.000237333	-0.762666667	0.827848617	101.0662089	-0.658202224	0	0	0.010891064	0.01365034	101.0662207	0.658202322	1	0
1	25000	0.001	0.3	0.05	1	0	0.00034	-0.66	0.784856675	101.8157934	-0.656607793	0	0	0.014905159	0.015996438	101.8158442	0.656607963	1	0
1	25000	0.001	0.3	0.05	1	1	0.0002416	-0.7584	0.813604326	100.2916483	-0.661128022	0	0	0.006813414	0.00891731	100.2916535	0.661128058	1	0
1	25000	0.001	0.78	0.001	0.1	0	0.000740741	-0.259259259	5.191662621	201.2715921	-0.733565652	0	0.48	0.646714407	0.677065326	201.4013994	0.733636641	1	0
1	25000	0.001	0.78	0.001	0.1	0.1	0.000606061	-0.393939394	4.260675029	188.1400891	-0.724861872	0	0.99	0.572487828	0.701937116	188.1966148	0.724991207	1	0
1	25000	0.001	0.78	0.001	0.5	0	0.001891892	0.891891892	8.807203705	179.307113	-0.730091489	0	1	0.534567276	0.720201387	179.3884573	0.73184921	1	0
1	25000	0.001	0.78	0.001	0.5	0.5	0.000547945	-0.452054795	5.470695057	148.29402	-0.695244264	0	1	0.30683577	0.79597796	148.2981105	0.697273754	1	0
1	25000	0.001	0.78	0.001	1	0	8.00E-04	-0.2	5.60357029	162.0236281	-0.737735435	0	1	0.427683651	0.760072123	162.0394965	0.740091047	1	0
1	25000	0.001	0.78	0.001	1	1	0.00152	0.52	6.873136111	132.0374614	-0.63954305	0	1	0.192613455	0.841452091	132.0400558	0.651585462	1	0
1	25000	0.001	0.78	0.01	0	0	0.00076	-0.24	1.685229955	121.023588	-0.843575763	0	0	0.121629556	0.121652875	121.0409269	0.843579783	1	0
1	25000	0.001	0.78	0.01	0.1	0	0.000836364	-0.163636364	1.702210522	119.5010969	-0.844790017	0	0	0.112689998	0.116434307	119.5143889	0.844794602	1	0
1	25000	0.001	0.78	0.01	0.1	0.1	0.000685714	-0.314285714	1.926189005	116.0518529	-0.846111132	0	0	0.092795735	0.1125711	116.0572778	0.846149879	1	0
1	25000	0.001	0.78	0.01	0.5	0	0.000693333	-0.306666667	1.73973178	114.7730508	-0.849617205	0	0	0.085555258	0.096352191	114.7773567	0.849626657	1	0
1	25000	0.001	0.78	0.01	0.5	0.5	0.001066667	0.066666667	2.356079606	108.1628677	-0.850258172	0	0	0.049297525	0.091690145	108.1641654	0.850827665	1	0
1	25000	0.001	0.78	0.01	1	0	0.00062	-0.38	1.708800749	111.3726651	-0.853608534	0	0	0.066578893	0.078134837	111.3743461	0.853622101	1	0
1	25000	0.001	0.78	0.01	1	1	0.000312	-0.688	1.26427845	104.9201843	-0.851888336	0	0.01	0.031397503	0.057482526	104.9207373	0.856797793	1	0
1	25000	0.001	0.78	0.05	0.1	0	0.000661818	-0.338181818	0.782663391	103.9771192	-0.865325802	0	0	0.02625928	0.026765624	103.9776397	0.8653259	1	0
1	25000	0.001	0.78	0.05	0.1	0.1	0.000737143	-0.262857143	1.002445988	103.1117965	-0.865893835	0	0	0.021641709	0.024569534	103.1120823	0.865894176	1	0
1	25000	0.001	0.78	0.05	0.5	0	0.000704	-0.296	0.751531769	102.7648043	-0.86668382	0	0	0.019849509	0.021129319	102.7649742	0.866683899	1	0
1	25000	0.001	0.78	0.05	0.5	0.5	0.000797333	-0.202666667	0.90303193	101.1006303	-0.868221485	0	0	0.011039631	0.014993866	101.1006526	0.868221676	1	0
1	25000	0.001	0.78	0.05	1	0	0.000772	-0.228	0.753657747	101.8818429	-0.867733819	0	0	0.015108187	0.016750533	101.8819301	0.867733882	1	0
1	25000	0.001	0.78	0.05	1	1	0.0008496	-0.1504	0.75484568	100.3054841	-0.86941954	0	0	0.006876559	0.00993574	100.3054893	0.869419597	1	0
1	25000	0.01	0.3	0.001	0.1	0	0.002962963	-0.703703704	1.226703345	19.51500017	-0.298359281	0	1	0.650858634	0.682376769	19.56838759	0.301966786	1	0
1	25000	0.01	0.3	0.001	0.1	0.1	0.002121212	-0.787878788	1.103879127	18.04705803	-0.272507297	0	1	0.575961377	0.707393049	18.06597393	0.27958519	1	0
1	25000	0.01	0.3	0.001	0.5	0	0.003513514	-0.648648649	1.180248949	17.70210385	-0.314066654	0	1	0.55011324	0.706374559	17.84784854	0.316403894	1	0
1	25000	0.01	0.3	0.001	0.5	0.5	0.003561644	-0.643835616	1.265400532	14.22459333	-0.165760671	0	0.99	0.316464418	0.774610444	14.26067628	0.302725402	1	0
1	25000	0.01	0.3	0.001	1	0	0.003	-0.7	1.077032961	15.75088298	-0.313081293	0	1	0.442502991	0.746932484	15.8020844	0.35140345	1	0
1	25000	0.01	0.3	0.001	1	1	0.00344	-0.656	1.136309817	12.62519265	-0.106637971	0	1	0.204065484	0.797503673	12.64879623	0.220672596	1	0
1	25000	0.01	0.3	0.01	0	0	0.00328	-0.672	0.766289762	11.52668394	-0.58219399	0	0.01	0.135276652	0.135858313	11.53733109	0.582441856	1	0
1	25000	0.01	0.3	0.01	0.1	0	0.003745455	-0.625454545	0.724312156	11.4095844	-0.583683328	0	0.02	0.128080434	0.133437177	11.4202159	0.583958252	1	0
1	25000	0.01	0.3	0.01	0.1	0.1	0.003285714	-0.671428571	0.761845236	10.93553421	-0.58568259	0	0.05	0.103425465	0.130449546	10.93989548	0.586368499	1	0
1	25000	0.01	0.3	0.01	0.5	0	0.002506667	-0.749333333	0.799666597	10.78544507	-0.601711824	0	0	0.094713199	0.105840313	10.79030217	0.601860092	1	0
1	25000	0.01	0.3	0.01	0.5	0.5	0.00296	-0.704	0.750584957	10.04711051	-0.608577226	0	0.03	0.055102632	0.097306774	10.04780911	0.609297577	1	0
1	25000	0.01	0.3	0.01	1	0	0.00318	-0.682	0.728010989	10.45942501	-0.609899096	0	0	0.076586348	0.09148074	10.46188133	0.610040948	1	0
1	25000	0.01	0.3	0.01	1	1	0.002808	-0.7192	0.754676089	9.672070815	-0.622758901	0	0.03	0.035495652	0.076322826	9.672280999	0.623736557	1	0
1	25000	0.01	0.3	0.05	0.1	0	0.002945455	-0.705454545	0.720468167	9.615961188	-0.645636092	0	0	0.031832219	0.03256315	9.616364074	0.645644333	1	0
1	25000	0.01	0.3	0.05	0.1	0.1	0.002874286	-0.712571429	0.727422063	9.496572185	-0.647140626	0	0	0.02579284	0.030358531	9.496742373	0.6471553	1	0
1	25000	0.01	0.3	0.05	0.5	0	0.002858667	-0.714133333	0.727530984	9.464431947	-0.649930595	0	0	0.024045057	0.025991663	9.464637955	0.649937892	1	0
1	25000	0.01	0.3	0.05	0.5	0.5	0.00272	-0.728	0.738474102	9.247947686	-0.654696576	0	0	0.012981921	0.018931008	9.247973517	0.654701412	1	0
1	25000	0.01	0.3	0.05	1	0	0.002972	-0.7028	0.712460525	9.360576185	-0.653221991	0	0	0.018659524	0.020925433	9.360679105	0.653225156	1	0
1	25000	0.01	0.3	0.05	1	1	0.0030656	-0.69344	0.700641078	9.157414251	-0.658098218	0	0	0.00826414	0.013552291	9.157421386	0.65810069	1	0
1	25000	0.01	0.78	0.001	0.1	0	0.005925926	-0.407407407	1.599468362	19.76392216	-0.722556958	0	0.52	0.659356633	0.69082246	19.83434553	0.723566058	1	0
1	25000	0.01	0.78	0.001	0.1	0.1	0.006969697	-0.303030303	1.566112674	18.53276993	-0.706945727	0	0.97	0.588696496	0.717054125	18.58953761	0.708217566	1	0
1	25000	0.01	0.78	0.001	0.5	0	0.011081081	0.108108108	1.879301737	17.72918582	-0.692470538	0	0.95	0.55694535	0.736207307	17.82866572	0.700457249	1	0
1	25000	0.01	0.78	0.001	0.5	0.5	0.006575342	-0.342465753	1.802866715	14.03559281	-0.631844913	0	1	0.304234593	0.794065946	14.03948068	0.650104274	1	0
1	25000	0.01	0.78	0.001	1	0	0.0068	-0.32	1.4	15.57925768	-0.693043313	0	0.9	0.436737179	0.759413107	15.63311604	0.707051067	1	0
1	25000	0.01	0.78	0.001	1	1	0.00592	-0.408	1.447204201	12.32026459	-0.567697067	0	0.99	0.188382847	0.812754085	12.32254498	0.610669846	1	0
1	25000	0.01	0.78	0.01	0	0	0.00728	-0.272	0.589236795	12.13008963	-0.831585277	0	0	0.160139013	0.160524897	12.16081083	0.831659073	1	0
1	25000	0.01	0.78	0.01	0.1	0	0.007236364	-0.276363636	0.634803282	11.83740613	-0.83107962	0	0	0.145447209	0.158485339	11.86156173	0.831250204	1	0
1	25000	0.01	0.78	0.01	0.1	0.1	0.007685714	-0.231428571	0.680336051	11.17730675	-0.816745656	0	0	0.116000926	0.185330828	11.19276973	0.817948915	1	0
1	25000	0.01	0.78	0.01	0.5	0	0.008	-0.2	0.614057543	11.05036155	-0.826686325	0	0	0.108760535	0.159256339	11.06078499	0.827200699	1	0
1	25000	0.01	0.78	0.01	0.5	0.5	0.007413333	-0.258666667	0.62182527	9.832629349	-0.723543808	0	0.14	0.046284074	0.295964748	9.835190661	0.756029899	1	0
1	25000	0.01	0.78	0.01	1	0	0.00766	-0.234	0.584807661	10.48951888	-0.828024933	0	0	0.080480616	0.148311573	10.49161538	0.828807368	1	0
1	25000	0.01	0.78	0.01	1	1	0.008112	-0.1888	0.498766478	9.419511013	-0.369123884	0	0.6	0.022863712	0.390876025	9.420645689	0.568359063	1	0
1	25000	0.01	0.78	0.05	0.1	0	0.007563636	-0.243636364	0.346219249	9.999355587	-0.856874574	0	0	0.047397329	0.052213611	10.00299268	0.856894915	1	0
1	25000	0.01	0.78	0.05	0.1	0.1	0.007988571	-0.201142857	0.388949396	9.661112243	-0.847461031	0	0	0.033885896	0.064845717	9.662106598	0.847812797	1	0
1	25000	0.01	0.78	0.05	0.5	0	0.007850667	-0.214933333	0.338246458	9.620523495	-0.855167181	0	0	0.031468118	0.050849809	9.621004706	0.855251693	1	0
1	25000	0.01	0.78	0.05	0.5	0.5	0.007352	-0.2648	0.37248475	9.230898072	-0.821380237	0	0	0.012330876	0.086968271	9.230994526	0.828041984	1	0
1	25000	0.01	0.78	0.05	1	0	0.007592	-0.2408	0.334137696	9.422045881	-0.857213674	0	0	0.021958187	0.044473305	9.42216789	0.857274393	1	0
1	25000	0.01	0.78	0.05	1	1	0.0079456	-0.20544	0.304256734	9.099102382	-0.423478909	0	0.48	0.005274366	0.128176053	9.099201434	0.607810203	1	0
1	25000	0.1	0.3	0.001	0.1	0	0.03	-0.7	0.793146224	1.3863704	-0.161233961	0	1	0.707404916	0.724439751	1.467673019	0.280205799	1	0
1	25000	0.1	0.3	0.001	0.1	0.1	0.030909091	-0.690909091	0.768885279	1.3135297	-0.12077955	0	1	0.65439085	0.707776184	1.424111879	0.254213473	1	0
1	25000	0.1	0.3	0.001	0.5	0	0.028918919	-0.710810811	0.785273514	1.174537392	-0.122001059	0	1	0.618527129	0.709444641	1.280143867	0.38378919	1	0
1	25000	0.1	0.3	0.001	0.5	0.5	0.034657534	-0.653424658	0.729534049	1.062988058	-0.000692467	0	1	0.426058341	0.605720912	1.259516733	0.367857473	1	0
1	25000	0.1	0.3	0.001	1	0	0.0254	-0.746	0.779487011	1.00110509	-0.115470526	0	1	0.530536153	0.703191799	1.120705903	0.396593091	1	0
1	25000	0.1	0.3	0.001	1	1	0.03152	-0.6848	0.719066061	0.790073448	0.017891847	0	0.96	0.300364245	0.512340922	0.893550438	0.430786895	1	0
1	25000	0.1	0.3	0.01	0	0	0.0312	-0.688	0.698592871	0.833052403	-0.390420874	0	0.94	0.345138305	0.345626947	0.883092972	0.401484282	1	0
1	25000	0.1	0.3	0.01	0.1	0	0.029527273	-0.704727273	0.71429327	0.732347587	-0.37526816	0	0.93	0.309195935	0.327147989	0.781815038	0.412966277	1	0
1	25000	0.1	0.3	0.01	0.1	0.1	0.029085714	-0.709142857	0.71586112	0.513988317	-0.268909846	0	0.94	0.224099048	0.321128701	0.569021031	0.347091901	1	0
1	25000	0.1	0.3	0.01	0.5	0	0.029573333	-0.704266667	0.709739232	0.612387991	-0.314803827	0	0.89	0.244140069	0.323412909	0.699567481	0.379127498	1	0
1	25000	0.1	0.3	0.01	0.5	0.5	0.0308	-0.692	0.697533432	0.306162816	-0.093918342	0	0.91	0.107644579	0.252676387	0.350880712	0.258887626	1	0
1	25000	0.1	0.3	0.01	1	0	0.03178	-0.6822	0.68920534	0.605892027	-0.26136234	0	0.9	0.215168961	0.305477237	0.746309713	0.369143937	1	0
1	25000	0.1	0.3	0.01	1	1	0.029864	-0.70136	0.704445768	0.236318878	-0.082293627	0	0.91	0.075216945	0.203397449	0.277748824	0.205112324	1	0
1	25000	0.1	0.3	0.05	0.1	0	0.030138182	-0.698618182	0.699803042	0.639069731	-0.366930169	0	0.78	0.208978691	0.229825735	0.686373678	0.388707875	1	0
1	25000	0.1	0.3	0.05	0.1	0.1	0.029302857	-0.706971429	0.708709203	0.259663984	-0.191973727	0	0.87	0.104051176	0.197108531	0.293532199	0.237032139	1	0
1	25000	0.1	0.3	0.05	0.5	0	0.029914667	-0.700853333	0.702155361	0.373806901	-0.247697378	0	0.8	0.138905446	0.211648961	0.437072199	0.292724424	1	0
1	25000	0.1	0.3	0.05	0.5	0.5	0.030162667	-0.698373333	0.699696899	0.11965153	-0.045768676	0	0.87	0.036404663	0.121105486	0.149907886	0.136476497	1	0
1	25000	0.1	0.3	0.05	1	0	0.030464	-0.69536	0.696534278	0.215586173	-0.138152431	0	0.9	0.084988993	0.186974259	0.254590756	0.201146693	1	0
1	25000	0.1	0.3	0.05	1	1	0.0303072	-0.696928	0.69760756	0.087274398	-0.017618776	0	0.91	0.026018213	0.092549454	0.100317398	0.084909724	1	0
1	25000	0.1	0.78	0.001	0.1	0	0.077407407	-0.225925926	0.558510659	1.877470781	-0.572265456	0	0.92	0.763871594	0.781789823	1.983597756	0.588124927	1	0
1	25000	0.1	0.78	0.001	0.1	0.1	0.078787879	-0.212121212	0.694329651	1.461922707	-0.477715663	0	0.98	0.663354609	0.775126294	1.541475807	0.521620176	1	0
1	25000	0.1	0.78	0.001	0.5	0	0.077297297	-0.227027027	0.60591195	1.244127366	-0.429327021	0	0.93	0.601194923	0.762054456	1.363353134	0.499703009	1	0
1	25000	0.1	0.78	0.001	0.5	0.5	0.084109589	-0.15890411	0.590250431	0.739424996	-0.168083268	0	0.99	0.279081267	0.598348176	0.80303008	0.297722273	1	0
1	25000	0.1	0.78	0.001	1	0	0.0692	-0.308	0.576194412	0.943959041	-0.366121921	0	0.85	0.45614012	0.721335247	1.028107842	0.468097252	1	0
1	25000	0.1	0.78	0.001	1	1	0.07936	-0.2064	0.538026022	0.623314441	-0.101184123	0	0.9	0.208694102	0.468334544	0.704382507	0.255546071	1	0
1	25000	0.1	0.78	0.01	0	0	0.07672	-0.2328	0.296755792	1.784611126	-0.642652535	0	0.58	0.685762634	0.68743393	1.822639295	0.644749883	1	0
1	25000	0.1	0.78	0.01	0.1	0	0.077890909	-0.221090909	0.277723925	0.713658227	-0.349139257	0	0.76	0.414051997	0.673694772	0.845356878	0.416281776	1	0
1	25000	0.1	0.78	0.01	0.1	0.1	0.076971429	-0.230285714	0.308994419	0.276536692	-0.114780957	0	0.91	0.112401884	0.465164247	0.31064699	0.191889245	1	0
1	25000	0.1	0.78	0.01	0.5	0	0.078586667	-0.214133333	0.264618803	0.248572521	-0.097743869	0	0.93	0.091338121	0.426976198	0.279309752	0.169572967	1	0
1	25000	0.1	0.78	0.01	0.5	0.5	0.079306667	-0.206933333	0.276877831	0.192459752	-0.007621597	0	0.97	0.056419017	0.204943982	0.227421676	0.061597068	1	0
1	25000	0.1	0.78	0.01	1	0	0.07748	-0.2252	0.273598246	0.202467472	-0.068014011	0	0.89	0.062817128	0.313813691	0.228696112	0.144696094	1	0
1	25000	0.1	0.78	0.01	1	1	0.079128	-0.20872	0.264170854	0.173827604	-0.004525874	0	0.97	0.051432975	0.145968786	0.196844802	0.046953596	1	0
1	25000	0.1	0.78	0.05	0.1	0	0.077825455	-0.221745455	0.231452189	0.175141845	-0.121269714	0	0.87	0.074702271	0.383036861	0.199695862	0.149325415	1	0
1	25000	0.1	0.78	0.05	0.1	0.1	0.078034286	-0.219657143	0.246810842	0.101134056	-0.037820998	0	0.95	0.03016375	0.195591158	0.122339332	0.068754247	1	0
1	25000	0.1	0.78	0.05	0.5	0	0.078101333	-0.218986667	0.22957073	0.096980903	-0.040101565	0	0.92	0.028315408	0.183833204	0.110061306	0.073663623	1	0
1	25000	0.1	0.78	0.05	0.5	0.5	0.077224	-0.22776	0.242175474	0.071572896	-0.007219501	0	0.95	0.021803514	0.09191146	0.082966904	0.031971327	1	0
1	25000	0.1	0.78	0.05	1	0	0.07748	-0.2252	0.234286662	0.068631071	-0.005817723	0	0.98	0.021247837	0.131338535	0.076463372	0.039600697	1	0
1	25000	0.1	0.78	0.05	1	1	0.0776304	-0.223696	0.235382188	0.069100168	0.002310837	0	0.96	0.020257789	0.065221606	0.081804152	0.019791858	1	0
1	25000	0.01	0.3	0.02	0	0	0.00334	-0.666	0.706823882	10.49078003	-0.616875505	0	0	0.077309051	0.07754295	10.49446833	0.616942624	1	0
1	25000	0.01	0.3	0.005	1	0	0.00328	-0.672	0.784856675	11.47783516	-0.565497634	0	0.15	0.134596859	0.175745766	11.48457842	0.566863613	1	0
1	25000	0.01	0.3	0.002	1	1	0.00376	-0.624	0.860697392	11.24052053	-0.37015017	0	1	0.126677879	0.685394282	11.2492826	0.47846414	1	0
1	25000	0.01	0.3	0.05	0	0	0.003064	-0.6936	0.710019718	9.682478572	-0.644018383	0	0	0.035051285	0.034889331	9.683084111	0.64402828	1	0
1	25000	0.01	0.3	0.025	1	0	0.002712	-0.7288	0.75314806	9.670394844	-0.641743027	0	0	0.034477234	0.038903511	9.67111396	0.641771763	1	0
1	25000	0.01	0.3	0.004	1	1	0.00288	-0.712	0.794984277	10.39208136	-0.531974552	0	0.61	0.075670878	0.274805712	10.39414565	0.567971093	1	0
